# Supplementary material for: Organic cations controlling the nuclearity of copper(ii) 2,5-pyridinedicarboxylates
Source: Royal Society of Chemistry journal article supplement (doi:10.1039/c3ra44008g), 2013-01-01
Supplement: c3ra44008g.pdf [file c3ra44008g.pdf]

## Organic cations controlling nuclearity of copper(II) 2,5-pyridinedicarboxylates

Krapa Sankar, Babulal Das and Jubaraj B. Baruah

Department of Chemistry, Indian Institute of Technology Guwahati, Guwahati 781 039

Assam, India, Fax: +91-361-2690762; Ph. +91-361-2582311; email: [juba@iitg.ernet.in](mailto:juba@iitg.ernet.in)

### Supplementary data:

[A] Powder diffraction pattern of the complexes:

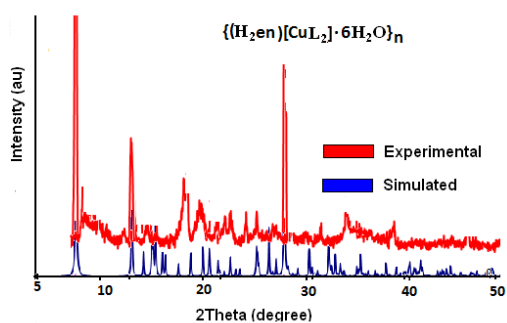

Complex 1

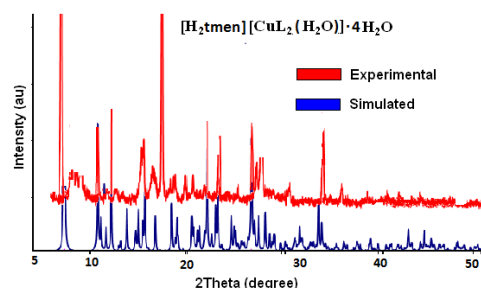

Complex 2

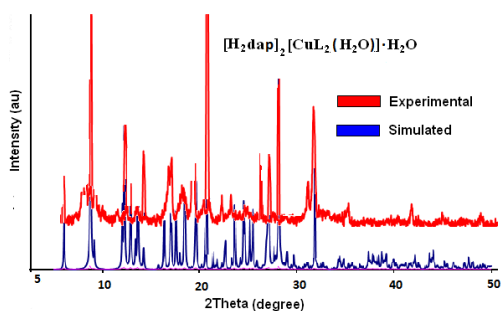

Complex 3

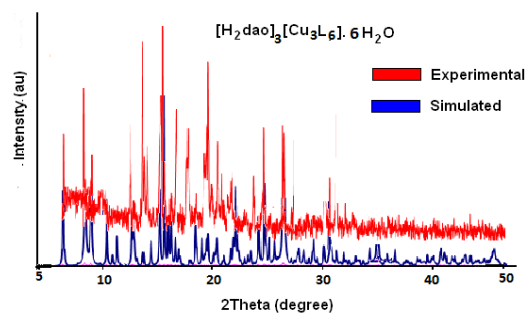

Complex 4

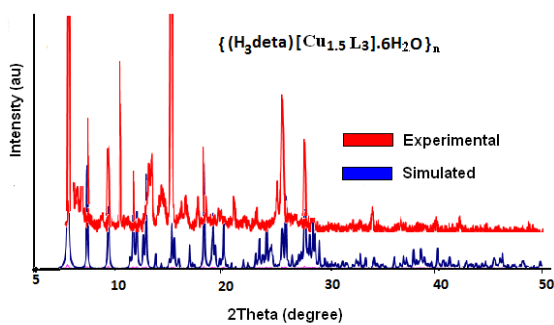

**Complex 5**

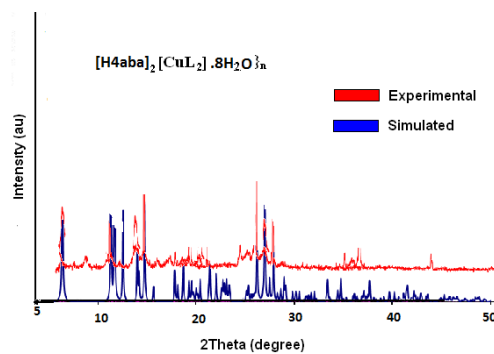

**Complex 6**

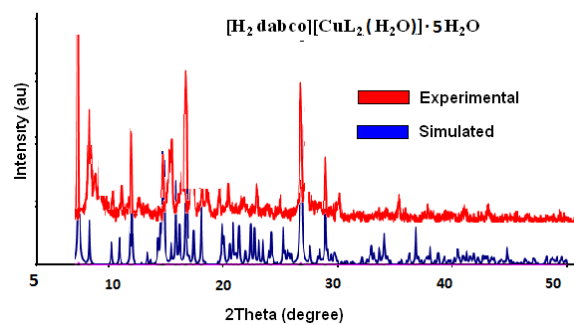

**Complex 7**

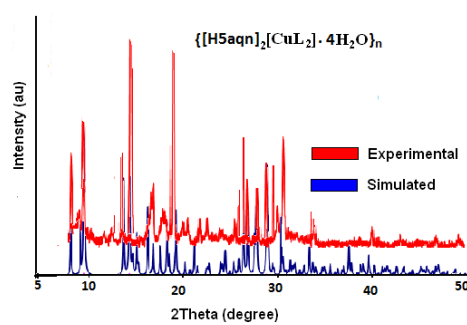

**Complex 8**

[B] Thermogram of the complexes:

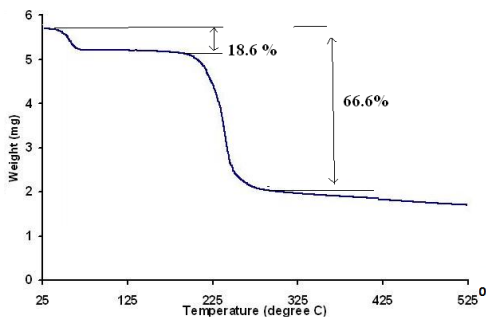

**Complex 1**

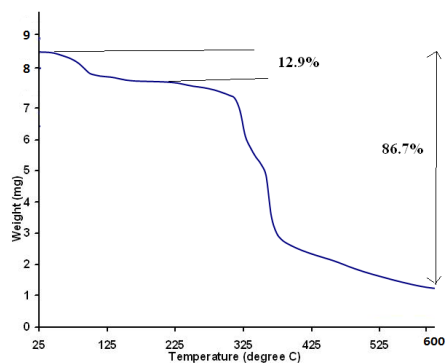

**Complex 2**

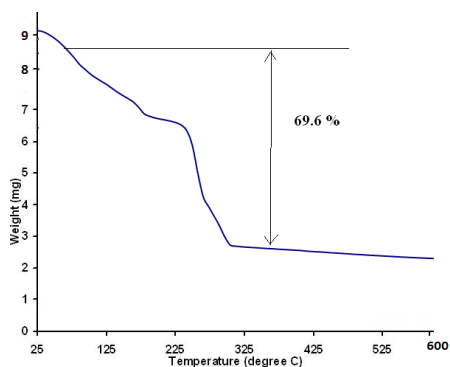

**Complex 3**

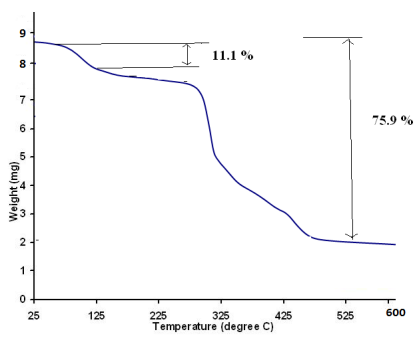

**Complex 4**

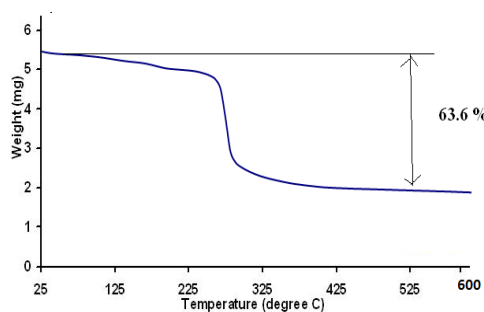

**Complex 5**

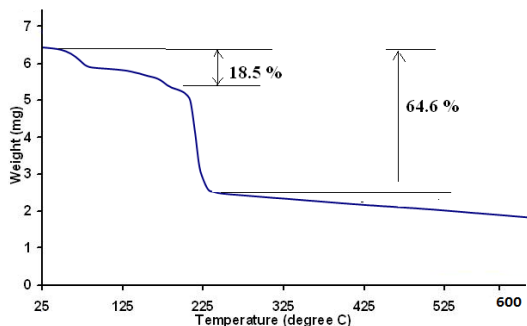

**Complex 6**

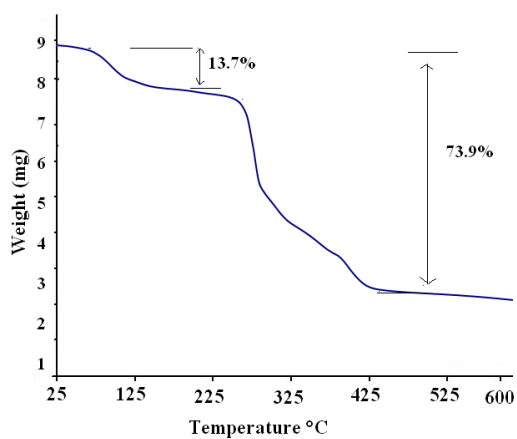

**Complex 7**

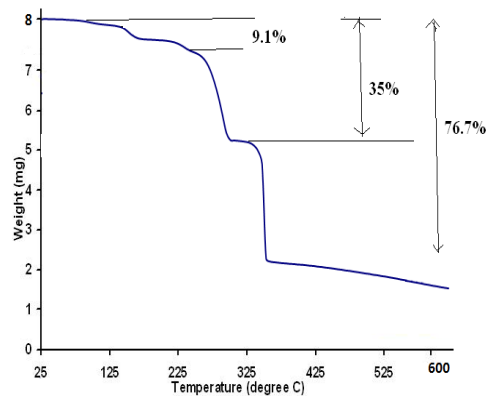

**Complex 8**

[C] EPR Spectra recorded in solid state central field at 3200 G:

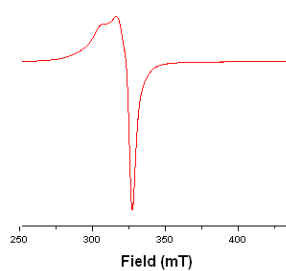

**Complex 1**

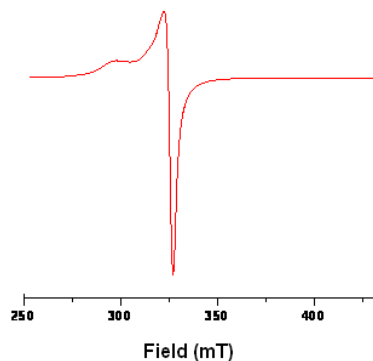

**Complex 2**

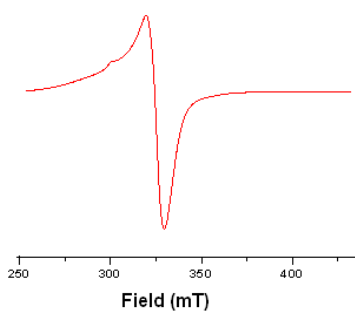

**Complex 3**

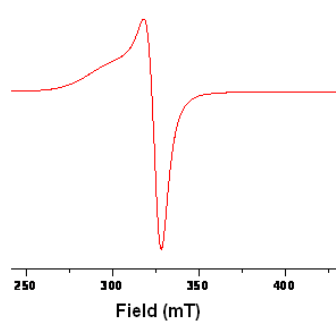

**Complex 4**

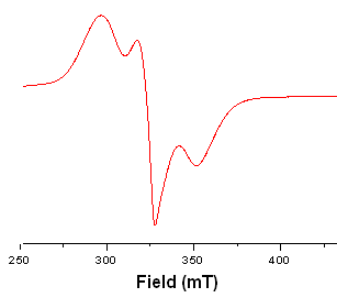

**Complex 5**

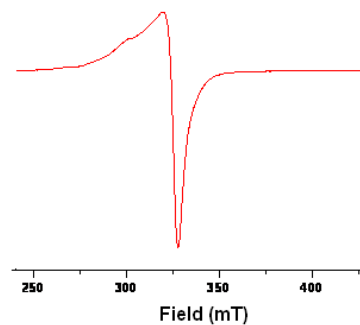

**Complex 6**

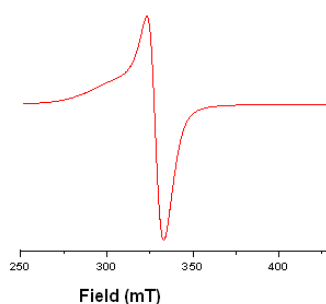

**Complex 7**

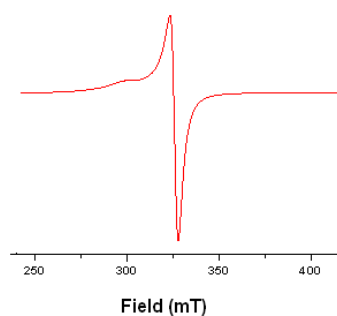

**Complex 8**

[E] Hydrogen bond parameters for the complexes **1-8**:

| Compound                                                                                             | D-H...A (symmetry)                    | $d_{D-H}(\text{Å})$ | $d_{H...A}(\text{Å})$ | $d_{D...A}(\text{Å})$ | $\angle D-H...A(^{\circ})$ |
|------------------------------------------------------------------------------------------------------|---------------------------------------|---------------------|-----------------------|-----------------------|----------------------------|
| <b>{(H<sub>2</sub>en)[CuL<sub>2</sub>]<br/>·6H<sub>2</sub>O}<sub>n</sub><br/>(1)</b>                 | N(2)-H(2B)...O(4) [2-x,1-y,-z]        | 0.89                | 2.10                  | 2.921(4)              | 153                        |
|                                                                                                      | N(2)-H(2C)...O(5) [x,1+y,z]           | 0.89                | 2.05                  | 2.877(5)              | 155                        |
|                                                                                                      | N(2)-H(2A)...O(6) [x, y, z]           | 0.89                | 2.21                  | 3.037(5)              | 154                        |
|                                                                                                      | O(6)-H(6B)...O(3) [1-x,1-y,-z]        | 0.94(4)             | 1.75(4)               | 2.688(5)              | 178(6)                     |
|                                                                                                      | O(6)-H(6A)...O(5) [x, y, z]           | 0.95(5)             | 1.86(5)               | 2.807(5)              | 170(7)                     |
|                                                                                                      | O(7)-H(7A)...O(2) [1-x,-y,1-z]        | 0.93(6)             | 1.95(6)               | 2.796(5)              | 150(6)                     |
|                                                                                                      | O(7)-H(7B)...O(6) [x, y, z]           | 0.95(7)             | 1.98(6)               | 2.926(5)              | 173(7)                     |
| <b>[H<sub>2</sub>tmen][CuL<sub>2</sub><br/>(H<sub>2</sub>O)]·4H<sub>2</sub>O<br/>(2)</b>             | N(3)-H(3N)...O(3) [2-x, 1-y, 1-z]     | 0.88(6)             | 1.85(6)               | 2.726(6)              | 174(6)                     |
|                                                                                                      | N(4)-H(4N)...O(7) [1+x, -1+y, 1+z]    | 0.94(7)             | 1.71(7)               | 2.646(6)              | 179(10)                    |
|                                                                                                      | O(9)-H(8AA)...O(11) [1-x, 1-y, 1-z]   | 0.96(5)             | 2.11(7)               | 2.955(6)              | 146(9)                     |
|                                                                                                      | O(9)-H(8AB)...O(8) [-1+x, y, z]       | 0.95(6)             | 1.76(7)               | 2.716(5)              | 175(8)                     |
|                                                                                                      | O(10)-H(10B)...O(12) [x, y, z]        | 0.87(9)             | 2.15(8)               | 2.878(11)             | 142(9)                     |
|                                                                                                      | O(11)-H(9AA)...O(4) [-1+x, y, z]      | 0.95(6)             | 1.88(6)               | 2.812(8)              | 166(7)                     |
|                                                                                                      | O(12)-H(12B)...O(13) [x, y, z]        | 0.96(15)            | 2.00(19)              | 2.914(10)             | 158(10)                    |
|                                                                                                      | O(13)-H(13B)...O(4) [-1+x, y, z]      | 0.94(6)             | 1.86(6)               | 2.796(8)              | 172(9)                     |
| O(13)-H(13A)...O(9) [-x, 1-y, -z]                                                                    | 0.96(12)                              | 1.90(13)            | 2.818(8)              | 159(17)               |                            |
| <b>[H<sub>2</sub>dap]<sub>2</sub><br/>[CuL<sub>2</sub>(H<sub>2</sub>O)]·H<sub>2</sub>O<br/>(3)</b>   | N(3)-H(3A)...O(10) [-1+x,y,z]         | 0.89                | 1.92                  | 2.811(3)              | 174                        |
|                                                                                                      | N(3)-H(3B)...O(7) [-x,-y,-z]          | 0.89                | 1.88                  | 2.761(3)              | 169                        |
|                                                                                                      | N(3)-H(3C)...O(6) [x, y, z]           | 0.89                | 2.48                  | 3.252(3)              | 146                        |
|                                                                                                      | N(4)-H(4A)...O(4) [1-x,1-y,1-z]       | 0.89                | 1.91                  | 2.797(3)              | 171                        |
|                                                                                                      | N(4)-H(4C)...O(3) [x, 1+y, z]         | 0.89                | 1.94                  | 2.762(3)              | 154                        |
|                                                                                                      | O(9)-H(9C)...O(8) [-x, -y,-z]         | 0.91(3)             | 1.89(3)               | 2.744(3)              | 157(3)                     |
|                                                                                                      | O(9)-H(9D)...O(4) [x,1-y,-z]          | 0.91(3)             | 1.87(3)               | 2.757(3)              | 165(3)                     |
|                                                                                                      | O(10)-H(10C)...O(6) [x, y, z]         | 0.94(4)             | 1.96(4)               | 2.876(3)              | 166(4)                     |
| <b>[H<sub>2</sub>dao]<sub>3</sub><br/>[Cu<sub>3</sub>L<sub>6</sub>]·6H<sub>2</sub>O (4)</b>          | N(4)-H(4A)...O(13) [1-x,1-y,1-z]      | 0.89                | 1.97                  | 2.798(4)              | 155                        |
|                                                                                                      | N(4)-H(4B)...O(10) [2-x,1-y,1-z]      | 0.89                | 1.98                  | 2.861(4)              | 169                        |
|                                                                                                      | N(5)-H(5A)...O(19) [-x,1-y,-z]        | 0.89                | 2.00                  | 2.872(4)              | 167                        |
|                                                                                                      | N(5)-H(5B)...O(12) [-x,1-y,-z]        | 0.89                | 1.98                  | 2.843(4)              | 164                        |
|                                                                                                      | N(6)-H(6A)...O(7) [x, y, z]           | 0.89                | 1.88                  | 2.766(4)              | 171                        |
|                                                                                                      | N(6)-H(6B)...O(15) [x, y, z]          | 0.89                | 1.89                  | 2.762(4)              | 165                        |
| <b>{(H<sub>3</sub>deta)<br/>[Cu<sub>1.5</sub>L<sub>3</sub>]·6H<sub>2</sub>O}<sub>n</sub><br/>(5)</b> | N(4)-H(4A)...O(7) [x, y, z]           | 0.89                | 2.23                  | 2.967(6)              | 140                        |
|                                                                                                      | N(4)-H(4B)...O(6) [-1+x,y,z]          | 0.89                | 2.16                  | 2.929(5)              | 144                        |
|                                                                                                      | N(4)-H(4C)...O(14) [-x,1-y,1-z]       | 0.89                | 1.88                  | 2.761(6)              | 172                        |
|                                                                                                      | N(5)-H(5A)...O(15) [x, y, z]          | 0.90                | 1.94                  | 2.830(6)              | 170                        |
|                                                                                                      | N(5)-H(5B)...O(12) [x,-1+y,1+z]       | 0.90                | 1.81                  | 2.691(4)              | 165                        |
|                                                                                                      | N(6)-H(6A)...O(4) [1-x,1-y,1-z]       | 0.89                | 1.99                  | 2.799(5)              | 151                        |
|                                                                                                      | N(6)-H(6B)...O(4) [1-x,1-y,1-z]       | 0.89                | 1.83                  | 2.697(6)              | 165                        |
|                                                                                                      | N(6)-H(6C)...O(18) [x, y, z]          | 0.89                | 2.00                  | 2.846(8)              | 159                        |
| <b>[H<sub>4</sub>aba]<sub>2</sub>[CuL<sub>2</sub>]<br/>·8H<sub>2</sub>O}<sub>n</sub> (6)</b>         | N(2)-H(2A)...O(8) [-1/2+x, 1/2-y, z]  | 0.89                | 1.99                  | 2.868(4)              | 171                        |
|                                                                                                      | N(2)-H(2B)...O(3) [-1/2+x,1/2-y, 1+z] | 0.89                | 1.91                  | 2.769(4)              | 162                        |
|                                                                                                      | O(5)-H(5OB)...O(2) [x, y, z]          | 0.95(9)             | 2.24(9)               | 3.025(7)              | 139(8)                     |
|                                                                                                      | O(6)-H(6OA)...O(3) [1/2-x, 1/2+y,1-z] | 0.96(4)             | 1.80(4)               | 2.752(5)              | 174(4)                     |
|                                                                                                      | O(7)-H(7OA)...O(4) [x, y, -1+z]       | 0.93(3)             | 1.88(3)               | 2.780(5)              | 163(5)                     |
|                                                                                                      | O(7)-H(7OB)...O(8) [x, y, z]          | 0.95(6)             | 1.95(6)               | 2.861(5)              | 162(5)                     |
|                                                                                                      | O(8)-H(8OB)...O(6) [x, y, z]          | 0.94(6)             | 1.89(5)               | 2.820(6)              | 167(5)                     |
| N(3)-H(3N)...O(7) [1-x, -y, -z]                                                                      | 0.96(5)                               | 1.61(5)             | 2.564(6)              | 172(5)                |                            |

|                                                                                                |                                      |          |          |           |         |
|------------------------------------------------------------------------------------------------|--------------------------------------|----------|----------|-----------|---------|
| [H <sub>2</sub> dabco]<br>[CuL <sub>2</sub> (H <sub>2</sub> O)]<br>·5H <sub>2</sub> O (7)      | N(4)-H(4N)···O(3) [-x, 1-y, 1-z]     | 0.99(6)  | 1.77(6)  | 2.711(7)  | 157(6)  |
|                                                                                                | O(9)-H(9OB)···O(4) [1+x, y, z]       | 0.94(5)  | 1.82(4)  | 2.752(6)  | 171(6)  |
|                                                                                                | O(9)-H(9OA)···O(12) [1-x, 1-y, -z]   | 0.96(7)  | 1.87(5)  | 2.755(7)  | 153(9)  |
|                                                                                                | O(10)-H(10C)···O(3) [x, y, z]        | 0.91(10) | 1.81(10) | 2.721(7)  | 176(9)  |
|                                                                                                | O(10)-H(10D)···O(11) [1-x, 1-y, 1-z] | 1.00(9)  | 1.79(8)  | 2.751(7)  | 159(8)  |
|                                                                                                | O(12)-H(12C)···O(10) [x, y, z]       | 0.96(13) | 1.75(13) | 2.703(9)  | 172(13) |
|                                                                                                | O(12)-H(12D)···O(13) [1-x, 1-y, 1-z] | 0.97(3)  | 1.83(4)  | 2.772(11) | 166(3)  |
|                                                                                                | O(13)-H(13C)···O(14) [1-x, -y, 1-z]  | 0.97(11) | 1.99(9)  | 2.775(9)  | 137(9)  |
|                                                                                                | O(14)-H(14C)···O(2) [x, y, 1+z]      | 0.95(14) | 1.84(13) | 2.771(9)  | 165(8)  |
|                                                                                                | N(3)-H(3N)···O(7) [1-x, -y, -z]      | 0.96(5)  | 1.61(5)  | 2.564(6)  | 172(5)  |
| {[H <sub>5</sub> aqn] <sub>2</sub> [CuL <sub>2</sub> ]<br>·4H <sub>2</sub> O} <sub>n</sub> (8) | N(4)-H(4N)···O(3) [-x, 1-y, 1-z]     | 0.99(6)  | 1.77(6)  | 2.711(7)  | 157(6)  |
|                                                                                                | N(2)-H(2N)···O(3) [2-x, -y, 1-z]     | 0.95(4)  | 1.78(4)  | 2.722(6)  | 171(4)  |
|                                                                                                | N(3)-H(3A)···O(5) [x, y, -1+z]       | 0.96(7)  | 2.16(7)  | 3.073(7)  | 157(7)  |
|                                                                                                | N(3)-H(3B)···O(1) [x, y, z]          | 0.95(9)  | 2.27(8)  | 3.119(6)  | 150(5)  |

[F] Temperature range for the loss of different components of the complexes 1-8

| Complex                                                                                       | Evaporation tem. Of lattice H <sub>2</sub> O                                                                                                                                                                                                                                  | Loss of organic cation / ligand (L)                                                                                                                                             |
|-----------------------------------------------------------------------------------------------|-------------------------------------------------------------------------------------------------------------------------------------------------------------------------------------------------------------------------------------------------------------------------------|---------------------------------------------------------------------------------------------------------------------------------------------------------------------------------|
| {(H <sub>2</sub> en)[CuL <sub>2</sub> ]·6H <sub>2</sub> O} <sub>n</sub> (1)                   | 50-80 °C<br>Loss of six water molecules<br>Exptal = 18.6 %<br>Calcd = 19.1 %                                                                                                                                                                                                  | 222-271 °C<br>Loss of one L leading to [(en)CuL] <sub>n</sub><br>Exptal = 66.6 %<br>Calcd = 65.5 %                                                                              |
| [H <sub>2</sub> tmen][CuL <sub>2</sub> (H <sub>2</sub> O)]·4H <sub>2</sub> O (2)              | 50-225 °C<br>Loss of four water molecules<br>Exptal = 12.9 %<br>Calcd = 12.0 %                                                                                                                                                                                                | 222-600 °C<br>Leading to CuO<br>Exptal = 86.7 %<br>Calcd = 87.1 %                                                                                                               |
| [H <sub>2</sub> dap] <sub>2</sub> [CuL <sub>2</sub> (H <sub>2</sub> O)]·H <sub>2</sub> O (3)  | No distinction of water of crystallization could be made.<br>Weight loss 63-306 °C to form [CuL] <sub>n</sub><br>Exptal 70.2%<br>Calcd. 69.6<br>In this case sample is hygroscopic and the water loss from very temperature was observed hence we calculated loss from 63 °C. |                                                                                                                                                                                 |
| [H <sub>2</sub> dao] <sub>3</sub> [Cu <sub>3</sub> L <sub>6</sub> ]·6H <sub>2</sub> O (4)     | 75-107°C<br>Experimental 11.5%<br>Calcd. 5.7%<br>(ambiguity may be due to simultaneous loss of amine also)                                                                                                                                                                    | 227-450°C<br>The weight loss corresponds to loss of amine and partial loss of L and satisfy a composition [Cu <sub>3</sub> O(L) <sub>2</sub> ]<br>Exptal: 75.9 %<br>Calcd : 72% |
| {(H <sub>3</sub> deta)[Cu <sub>1.5</sub> L <sub>3</sub> ]·6H <sub>2</sub> O} <sub>n</sub> (5) | Loss of six water, loss of deta and loss of two pyridinedicarboxylate<br>64-350°C<br>Exptal: 63.6%; calcd. 66.7%                                                                                                                                                              |                                                                                                                                                                                 |
| [H <sub>4</sub> aba] <sub>2</sub> [CuL <sub>2</sub> ]·8H <sub>2</sub> O (6)                   | 64-200°C<br>Loss of eight water molecules<br>Exptal. 18.5% calcd. 18.4%                                                                                                                                                                                                       | 212-225°C<br>Loss of one pyridine dicarboxylate ligand and two molecules of 4-aminobenzyl amine leading to [CuL] <sub>n</sub><br>Exptal: 64.6 %<br>Cald. 66. 2%                 |
| [H <sub>2</sub> dabco][CuL <sub>2</sub> (H <sub>2</sub> O)]·5H <sub>2</sub> O (7)             | 58-200°C<br>Loss of five water molecules<br>Exptal: 13.7 %<br>Cald. 14.6%                                                                                                                                                                                                     | 225-425°C<br>Formation of [CuO <sub>0.5</sub> L <sub>0.5</sub> ] <sub>n</sub><br>Exptal: 73.9 %<br>Cald. 75 .0%                                                                 |
| {[H <sub>5</sub> aqn] <sub>2</sub> [CuL <sub>2</sub> ]·4H <sub>2</sub> O} <sub>n</sub> (8)    | 70-150°C<br>Loss of four water Molecules<br>Exptal: 9.1 %                                                                                                                                                                                                                     | 225-600°C<br>Loss of aminoquinoline, and one pyridinedicarboxylate<br>Leading to [CuL] <sub>n</sub>                                                                             |

|  |               |                               |
|--|---------------|-------------------------------|
|  | Cald. : 9.6 % | Exptal: 76.7 %<br>Cald. 75.0% |
|--|---------------|-------------------------------|

[G] Effect of temperature on the IR signals of complex 6.

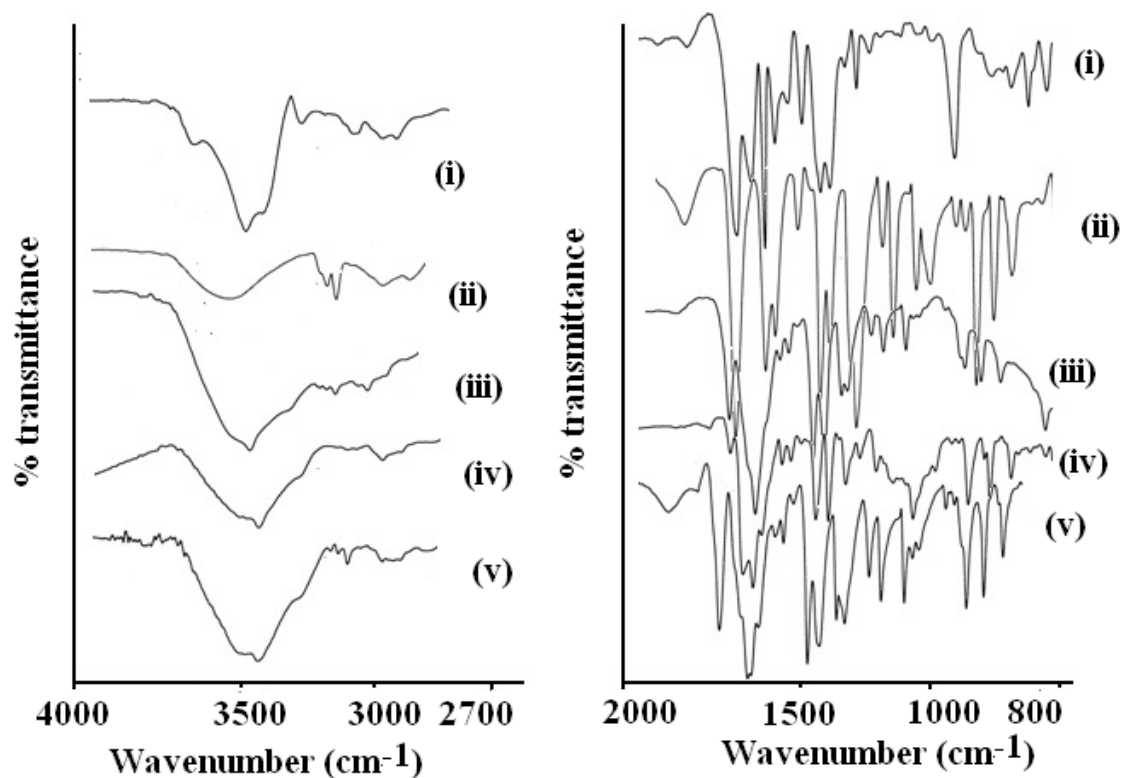

IR spectra of (i) 4-aminobenzylamine (ii)  $\{H_2[CuL_2]\}_n$  (iii) Complex  $[H4aba]_2[CuL_2] \cdot 8H_2O$  (6) (iv) Complex 6 heated at 75 °C for half an hr. (v) Complex 6 heated at 275 °C for half hr.
